# Supplementary material for: Synthesis and absolute configuration of hormone α1
Source: Springer Nature journal article supplement (doi:10.1038/nchembio.74), 2008-02-24
Supplement: 41589_2008_BFnchembio74_MOESM1_ESM.mol [file 41589_2008_BFnchembio74_MOESM1_ESM.mol]

  Chem3D  02190817433D

 64 63  0  0  0  0  0  0  0  0999 V2000
   -6.0090   -4.0316    2.3453 O   0  0  0  0  0  0  0  0  0  0  0  0
   -5.0769   -3.3528    1.5270 C   0  0  0  0  0  0  0  0  0  0  0  0
   -5.7526   -2.1478    0.8767 C   0  0  0  0  0  0  0  0  0  0  0  0
   -4.7756   -1.2911    0.0485 C   0  0  1  0  0  0  0  0  0  0  0  0
   -4.1166   -2.0755   -1.0827 C   0  0  0  0  0  0  0  0  0  0  0  0
   -2.6668   -1.7383   -1.4008 C   0  0  0  0  0  0  0  0  0  0  0  0
   -2.0948   -2.4935   -2.6092 C   0  0  0  0  0  0  0  0  0  0  0  0
   -0.6701   -2.0669   -3.0275 C   0  0  1  0  0  0  0  0  0  0  0  0
    0.3793   -2.2522   -1.9095 C   0  0  0  0  0  0  0  0  0  0  0  0
    0.6440   -0.9764   -1.0883 C   0  0  0  0  0  0  0  0  0  0  0  0
    1.6059   -1.2388    0.0828 C   0  0  0  0  0  0  0  0  0  0  0  0
    1.8870   -0.0366    1.0027 C   0  0  2  0  0  0  0  0  0  0  0  0
   -4.7230   -2.9260   -1.6940 O   0  0  0  0  0  0  0  0  0  0  0  0
   -0.2585   -2.8649   -4.2811 C   0  0  0  0  0  0  0  0  0  0  0  0
    0.6119    0.4344    1.7084 C   0  0  0  0  0  0  0  0  0  0  0  0
    2.5822    1.1040    0.2428 C   0  0  0  0  0  0  0  0  0  0  0  0
    3.0993    2.2563    1.1225 C   0  0  0  0  0  0  0  0  0  0  0  0
    3.8235    3.3334    0.2986 C   0  0  0  0  0  0  0  0  0  0  0  0
    4.1763    4.6196    1.0757 C   0  0  1  0  0  0  0  0  0  0  0  0
    5.1322    4.3903    2.2497 C   0  0  0  0  0  0  0  0  0  0  0  0
    4.4578    3.8134    3.3502 O   0  0  0  0  0  0  0  0  0  0  0  0
    2.7652   -0.4957    2.0009 O   0  0  0  0  0  0  0  0  0  0  0  0
   -5.4928   -0.0598   -0.5289 C   0  0  0  0  0  0  0  0  0  0  0  0
    4.7961    5.6440    0.1046 C   0  0  0  0  0  0  0  0  0  0  0  0
   -5.6137   -4.8436    2.6716 H   0  0  0  0  0  0  0  0  0  0  0  0
   -4.2278   -3.0435    2.1765 H   0  0  0  0  0  0  0  0  0  0  0  0
   -4.7079   -4.0828    0.7735 H   0  0  0  0  0  0  0  0  0  0  0  0
   -6.5955   -2.4944    0.2335 H   0  0  0  0  0  0  0  0  0  0  0  0
   -6.1980   -1.5136    1.6807 H   0  0  0  0  0  0  0  0  0  0  0  0
   -3.9637   -0.9415    0.7328 H   0  0  0  0  0  0  0  0  0  0  0  0
   -2.0771   -1.9872   -0.4881 H   0  0  0  0  0  0  0  0  0  0  0  0
   -2.6040   -0.6407   -1.5862 H   0  0  0  0  0  0  0  0  0  0  0  0
   -2.7784   -2.3290   -3.4772 H   0  0  0  0  0  0  0  0  0  0  0  0
   -2.1007   -3.5883   -2.3922 H   0  0  0  0  0  0  0  0  0  0  0  0
   -0.6957   -0.9881   -3.3226 H   0  0  0  0  0  0  0  0  0  0  0  0
    0.0717   -3.0933   -1.2466 H   0  0  0  0  0  0  0  0  0  0  0  0
    1.3563   -2.5563   -2.3552 H   0  0  0  0  0  0  0  0  0  0  0  0
    1.0704   -0.2008   -1.7663 H   0  0  0  0  0  0  0  0  0  0  0  0
   -0.3139   -0.5724   -0.6956 H   0  0  0  0  0  0  0  0  0  0  0  0
    2.5727   -1.6159   -0.3283 H   0  0  0  0  0  0  0  0  0  0  0  0
    1.1867   -2.0675    0.7025 H   0  0  0  0  0  0  0  0  0  0  0  0
    0.7293   -2.5288   -4.6717 H   0  0  0  0  0  0  0  0  0  0  0  0
   -0.9935   -2.7346   -5.1079 H   0  0  0  0  0  0  0  0  0  0  0  0
   -0.1862   -3.9537   -4.0575 H   0  0  0  0  0  0  0  0  0  0  0  0
    0.8371    1.1357    2.5424 H   0  0  0  0  0  0  0  0  0  0  0  0
    0.0558   -0.4216    2.1535 H   0  0  0  0  0  0  0  0  0  0  0  0
   -0.0759    0.9629    1.0116 H   0  0  0  0  0  0  0  0  0  0  0  0
    3.4462    0.6842   -0.3257 H   0  0  0  0  0  0  0  0  0  0  0  0
    1.8743    1.5287   -0.5065 H   0  0  0  0  0  0  0  0  0  0  0  0
    2.2490    2.7311    1.6647 H   0  0  0  0  0  0  0  0  0  0  0  0
    3.8058    1.8408    1.8766 H   0  0  0  0  0  0  0  0  0  0  0  0
    4.7523    2.8980   -0.1402 H   0  0  0  0  0  0  0  0  0  0  0  0
    3.1638    3.6148   -0.5574 H   0  0  0  0  0  0  0  0  0  0  0  0
    3.2302    5.0673    1.4724 H   0  0  0  0  0  0  0  0  0  0  0  0
    5.5491    5.3534    2.6213 H   0  0  0  0  0  0  0  0  0  0  0  0
    5.9770    3.7236    1.9706 H   0  0  0  0  0  0  0  0  0  0  0  0
    5.0420    3.8135    4.1125 H   0  0  0  0  0  0  0  0  0  0  0  0
    2.9027    0.1939    2.6542 H   0  0  0  0  0  0  0  0  0  0  0  0
   -4.7892    0.5896   -1.0983 H   0  0  0  0  0  0  0  0  0  0  0  0
   -5.9385    0.5638    0.2793 H   0  0  0  0  0  0  0  0  0  0  0  0
   -6.3129   -0.3598   -1.2203 H   0  0  0  0  0  0  0  0  0  0  0  0
    5.0007    6.6147    0.6112 H   0  0  0  0  0  0  0  0  0  0  0  0
    4.1148    5.8613   -0.7494 H   0  0  0  0  0  0  0  0  0  0  0  0
    5.7581    5.2687   -0.3128 H   0  0  0  0  0  0  0  0  0  0  0  0
  2  1  1  0      
  1 25  1  0      
  3  2  1  0      
  2 26  1  0      
  2 27  1  0      
  4  3  1  0      
  3 28  1  0      
  3 29  1  0      
  5  4  1  0      
  4 23  1  0      
  4 30  1  0      
  6  5  1  0      
  5 13  2  0      
  7  6  1  0      
  6 31  1  0      
  6 32  1  0      
  8  7  1  0      
  7 33  1  0      
  7 34  1  0      
  9  8  1  0      
  8 14  1  0      
  8 35  1  0      
 10  9  1  0      
  9 36  1  0      
  9 37  1  0      
 10 11  1  0      
 10 38  1  0      
 10 39  1  0      
 12 11  1  0      
 11 40  1  0      
 11 41  1  0      
 12 15  1  0      
 12 16  1  0      
 12 22  1  0      
 14 42  1  0      
 14 43  1  0      
 14 44  1  0      
 15 45  1  0      
 15 46  1  0      
 15 47  1  0      
 16 17  1  0      
 16 48  1  0      
 16 49  1  0      
 17 18  1  0      
 17 50  1  0      
 17 51  1  0      
 18 19  1  0      
 18 52  1  0      
 18 53  1  0      
 19 20  1  0      
 19 24  1  0      
 19 54  1  0      
 20 21  1  0      
 20 55  1  0      
 20 56  1  0      
 21 57  1  0      
 22 58  1  0      
 23 59  1  0      
 23 60  1  0      
 23 61  1  0      
 24 62  1  0      
 24 63  1  0      
 24 64  1  0      
M  END
